# Supplementary material
Source: MDPI journal article supplement (https://www.mdpi.com/2227-9040/11/7/396)
Supplement: s1 [file s1]

## Supplementary Material

# Improved Recognition Accuracy of Myrrh Decoction Pieces by Electronic Nose Technology Using GC-MS Analysis and Sensor Selection

Gailian Zhou <sup>1,2</sup>, Ting He <sup>1</sup>, Xueting Xie <sup>1</sup>, Jianfeng Qin <sup>2,3,4</sup>, Wei Wei <sup>2,3,4</sup>, Yujing Zhang <sup>5</sup> and Erwei Hao <sup>2,3,4,\*</sup>

<sup>1</sup> Faculty of Pharmacy, Guangxi University of Chinese Medicine, Nanning 530200, China; zhougl@gxctmu.edu.cn (G.Z.); 18897512615@163.com (T.H.); xxt13781186521@163.com (X.X.)

<sup>2</sup> Guangxi Key Laboratory of Efficacy Study on Chinese Materia Medica, Guangxi University of Chinese Medicine, Nanning 530200, China; qinjf@gxctmu.edu.cn (J.Q.); weiw2017@gxctmu.edu.cn (W.W.)

<sup>3</sup> Guangxi Collaborative Innovation Center of Research on Functional Ingredients of Agricultural Residues, Guangxi University of Chinese Medicine, Nanning 530200, China

<sup>4</sup> Guangxi Key Laboratory of TCM Formulas Theory and Transformation for Damp Diseases, Guangxi University of Chinese Medicine, Nanning 530200, China

<sup>5</sup> College of Electrical Engineering, Henan University of Technology, Zhengzhou 450001, China; 2021040@haut.edu.cn

\* Correspondence: haoew@gxctmu.edu.cn

**Synthesis of WO<sub>3</sub> quantum dots:** To prepare the WO<sub>3</sub> quantum dots, a straightforward solvothermal method was employed. Initially, a beaker containing 20 mL of OA, 2.5 mL of OLA, and 0.68 g of WCl<sub>6</sub> was subjected to ultrasonic dissolution and mixing using an ultrasonic-cleaning machine. The resulting solution was then transferred to a Teflon-lined stainless-steel autoclave and allowed to react at a temperature of 180 °C for a duration of 3 h. Once the reaction was complete, the sample was cooled down to room temperature (25 °C) and subsequently dissolved in ethanol and toluene. To ensure purity, the mixture underwent three rounds of centrifugation. Finally, the WO<sub>3</sub> quantum dots were obtained by dispersing the WO<sub>3</sub> mixture in toluene at a concentration of 20 mg/mL.

**Synthesis of Fe<sub>2</sub>O<sub>3</sub> hollow nanorods:** In a glass beaker, 3 mmol of FeSO<sub>4</sub> was dissolved in 40 mL of ethylene glycol (EG) under vigorous stirring. Simultaneously, 3 mmol of H<sub>2</sub>C<sub>2</sub>O<sub>4</sub> was dissolved in 20 mL of deionized water with vigorous stirring. The FeSO<sub>4</sub> solution was then quickly added to the H<sub>2</sub>C<sub>2</sub>O<sub>4</sub> solution. After stirring vigorously at 25 °C, a red homogeneous mixture was formed. This solution was transferred to an 80 mL Teflon-lined autoclave and heated at 120 °C for 24 h in a furnace. Afterward, it was allowed to cool naturally. The resulting red precipitates of FeC<sub>2</sub>O<sub>4</sub>·2H<sub>2</sub>O were collected by centrifugation, washed multiple times with distilled water and ethanol, and dried at 60 °C in an air atmosphere for 2 h. Then, the as-prepared FeC<sub>2</sub>O<sub>4</sub>·2H<sub>2</sub>O powder (1 g) was dispersed in a NaOH solution (3 M) and stirred at 20 °C for 0.5 h. The powder sample was then collected by centrifugation, washed with ethanol several times, and dried at 60 °C in an air atmosphere for 12 h. The Fe(OH)<sub>3</sub> nanorods obtained previously were placed in a tube furnace, which was gradually heated to 400 °C with a ramping rate of 10 °C per minute. The temperature was maintained at 400 °C for 0.5 h in an air atmosphere. Finally, a brownish-red powder of hollowed-out hierarchical α-Fe<sub>2</sub>O<sub>3</sub> nanorods was obtained.

**Synthesis of ZnFe<sub>2</sub>O<sub>4</sub> nanorods:** To synthesize ZnFe<sub>2</sub>O<sub>4</sub>, the precursor ZnFe<sub>2</sub>(C<sub>2</sub>O<sub>4</sub>)<sub>3</sub> was prepared. Initially, a vigorously stirred solution was prepared by combining 15 mL of deionized water with 0.288 g of ZnSO<sub>4</sub>·7H<sub>2</sub>O and 0.556 g of FeSO<sub>4</sub>·7H<sub>2</sub>O. Subsequently, 45 mL of ethylene glycol (EG) containing 3 mmol of H<sub>2</sub>C<sub>2</sub>O<sub>4</sub> was added to the water solution. After vigorous stirring for 10 min, a yellow homogeneous mixture solution was formed. This mixture was then transferred into an 80 mL Teflon-lined autoclave and maintained at 120 °C for 24 h. Afterward, it was allowed to cool down to room temperature naturally. Yellow precipitates of ZnFe<sub>2</sub>(C<sub>2</sub>O<sub>4</sub>)<sub>3</sub> were collected by centrifugation. The resulting product was washed several times with distilled water and ethanol, followed by drying at 60

**Citation:** Zhou, G.; He, T.; Xie, X.; Qin, J.; Wei, W.; Zhang, Y.; Hao, E. Improved Recognition Accuracy of Myrrh Decoction Pieces by Electronic Nose Technology Using GC-MS Analysis and Sensor Selection. *Chemosensors* **2023**, *11*, 396. <https://doi.org/10.3390/chemosensors11070396>

Academic Editor: Simonetta Capone

Received: 16 June 2023

Revised: 9 July 2023

Accepted: 10 July 2023

Published: 14 July 2023

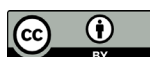

**Copyright:** © 2023 by the authors. Licensee MDPI, Basel, Switzerland. This article is an open access article distributed under the terms and conditions of the Creative Commons Attribution (CC BY) license (<https://creativecommons.org/licenses/by/4.0/>).

°C under vacuum conditions for 2 h. The obtained  $\text{ZnFe}_2(\text{C}_2\text{O}_4)_3$  precursor was further converted into  $\text{ZnFe}_2\text{O}_4$  by heat treatment at 350 °C (with a ramping rate of 10 °C per minute) for 0.5 h in an air atmosphere to eliminate organic matter.

**Synthesis of  $\text{SnO}_2$  nanowires:** Colloidal  $\text{SnO}_2$  nanowires were synthesized using a previously reported one-step method. Initially, 0.6 g of  $\text{SnCl}_4 \cdot 5\text{H}_2\text{O}$  was added to a beaker containing 20 mL of OA and 2.5 mL of OLA. The precursor solution was stirred with ultrasonication until it became clear and transparent. Next, 10 mL of anhydrous ethanol was added, and stirring continued until the solution became clear and transparent at room temperature. The precursor solution was then transferred to a 50 mL Teflon-lined stainless-steel autoclave and maintained at 180 °C for 6 h, respectively. Subsequently, it was cooled to room temperature in a cold-water bath. The resulting solution was dissolved in an appropriate amount of absolute ethanol and subjected to centrifugation at 8000 rpm for 8 min. The precipitate was washed twice with toluene and ethanol through repeated centrifugation. Finally, the product was well-dispersed in toluene at a concentration of 20 mg/mL.

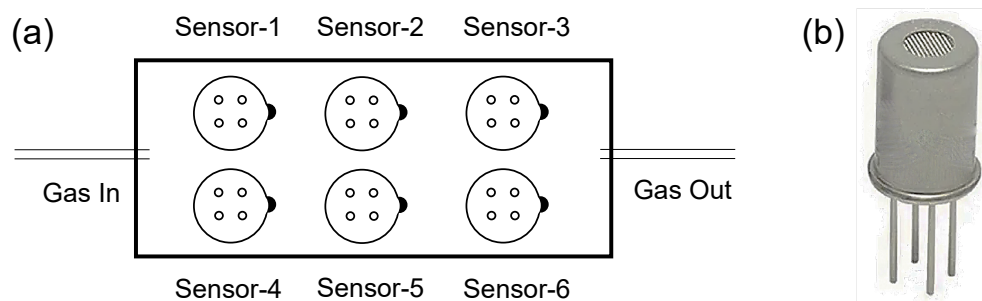

**Figure S1.** (a) The schematic of the sensor array consisting of six sensors. (b) Schematic diagram of gas sensor.

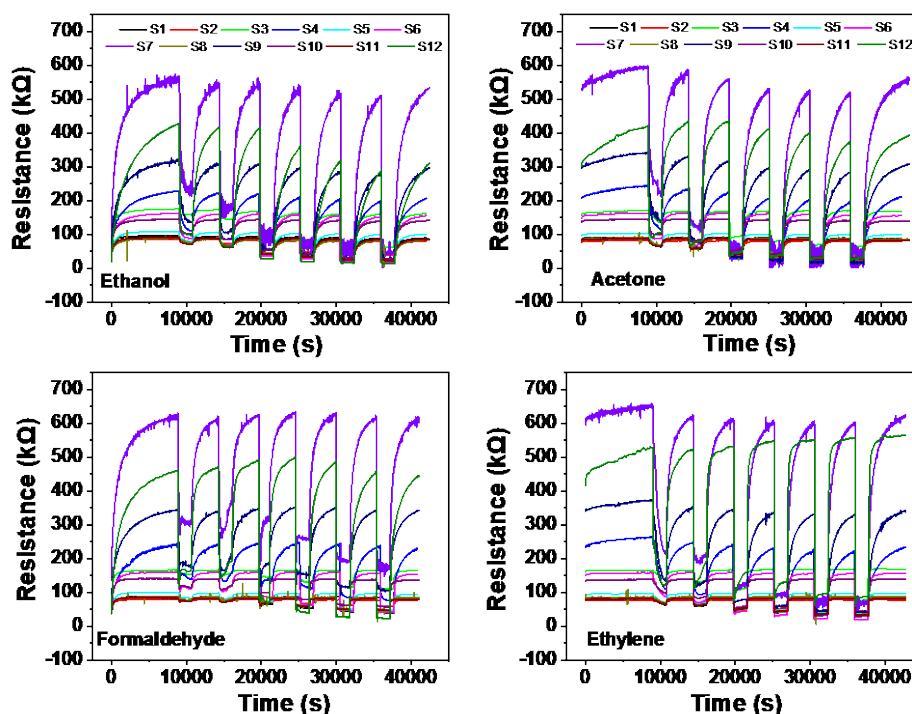

**Figure S2.** Dynamic response curves of 12 sensors to four target gases with concentrations of 0.5, 1, 5, 10, and 20 ppm respectively: (a) ethanol, (b) acetone (c) formaldehyde, and (d) ethylene.

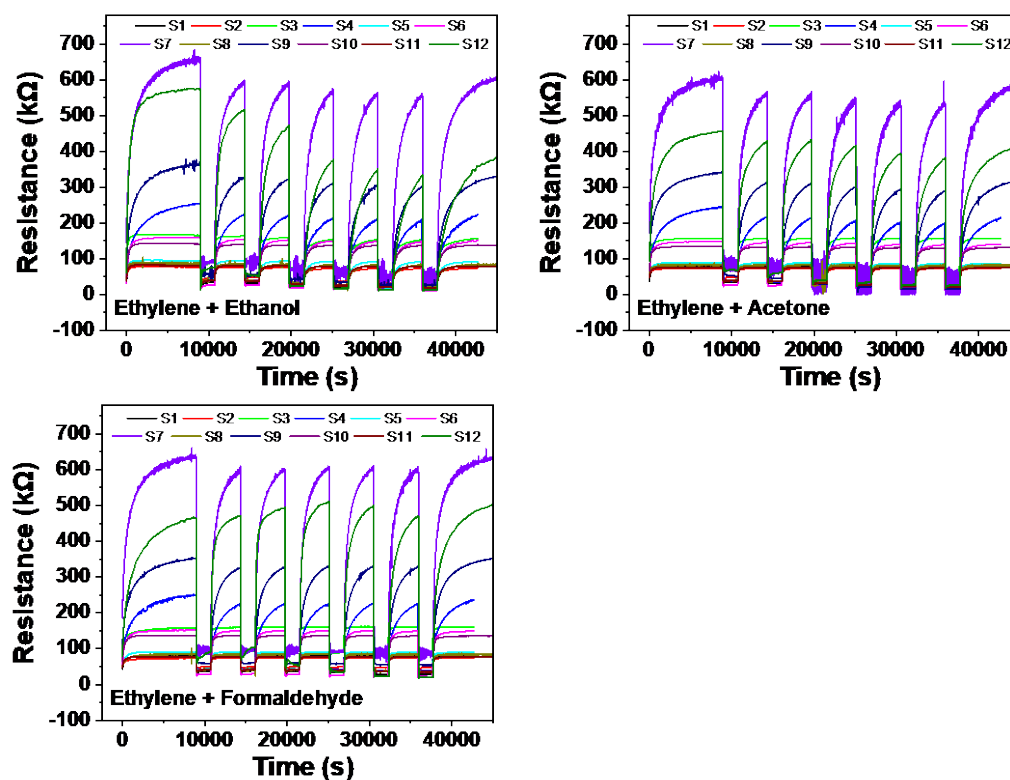

Figure S3. Dynamic response curves of 12 sensors to three types of mixed gases for six cycles: (a) 10 ppm ethylene and 10 ppm ethanol, (b) 10 ppm ethylene and 10 ppm acetone, and (c) 10 ppm ethylene and 10 ppm formaldehyde.

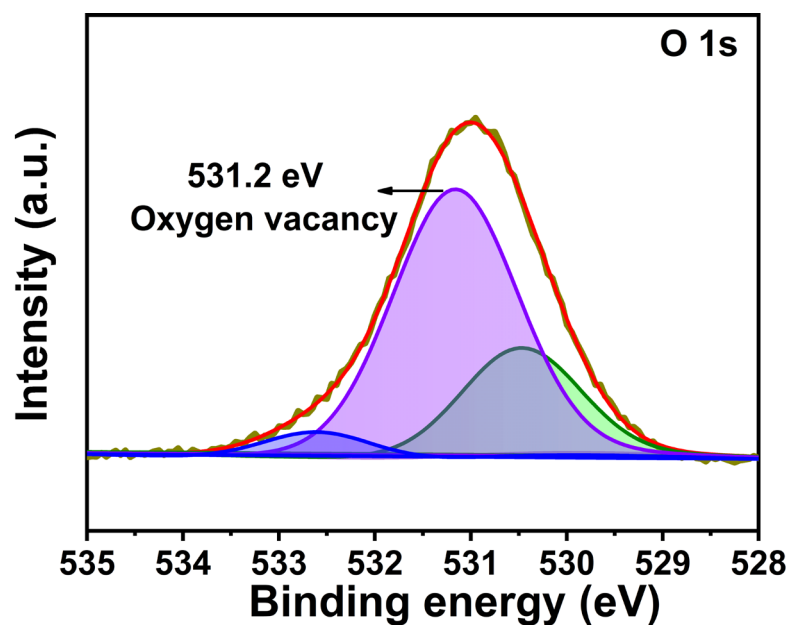

Figure S4. XPS spectra of O 1s and fitted data of SnO<sub>2</sub> nanowires.

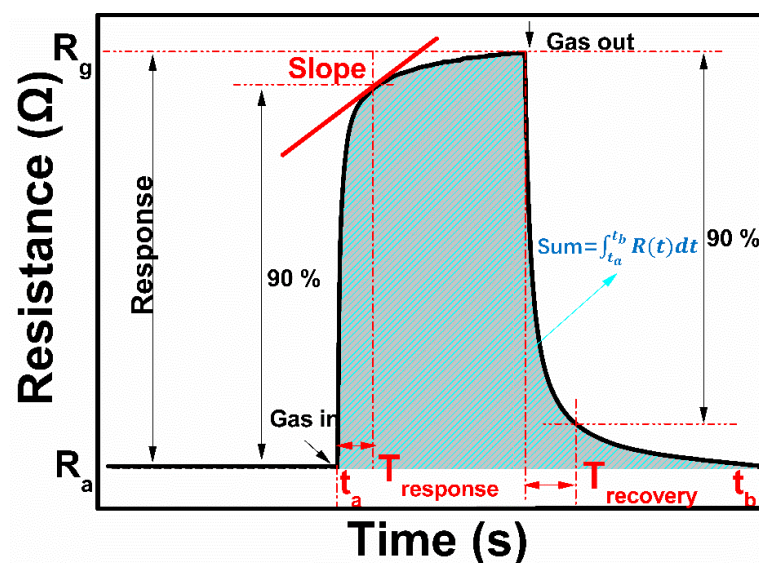

**Figure S5.** Schematic diagram of sensor parameters, including response, response and recovery time, integral area, and slope.

**Table S1.** Six myrrh components tested by GC–MS.

| No. | Composition                                                                                                                                            | S1   | S2    | S3   | S4   | S5   | S6   |
|-----|--------------------------------------------------------------------------------------------------------------------------------------------------------|------|-------|------|------|------|------|
| 1   | 1-Propanamine, 3-chloro-                                                                                                                               | -    | 0.61  | -    | -    | -    | -    |
| 2   | Benzeneethanamine                                                                                                                                      | -    | 0.48  | -    | -    | -    | -    |
| 3   | 2-(2-Methoxyphenyl)ethylamine                                                                                                                          | -    | 1.07  | -    | -    | -    | -    |
| 4   | 1,11-Undecanediamine                                                                                                                                   | -    | 0.63  | -    | -    | -    | -    |
| 5   | 3,5-Dimethoxyphenethylamine                                                                                                                            | -    | 1.06  | -    | -    | -    | -    |
| 6   | Phenylethanolamine                                                                                                                                     | -    | 0.31  | -    | -    | -    | -    |
| 7   | 4-Acetyl-1-methylcyclohexene                                                                                                                           | 0.21 | -     | -    | -    | -    | -    |
| 8   | (4aS,8aR)-3,8a-Dimethyl-5-methylene-4,4a,5,6,7,8,8a,9-octahydronaphtho[2,3-b]furan                                                                     | 1.5  | -     | -    | -    | -    | -    |
| 9   | 3,7-Cyclodecadien-1-one, 3,7-dimethyl-10-(1-methylethylidene)-, (E,E)-                                                                                 | 0.22 | -     | 0.39 | -    | -    | -    |
| 10  | Cyclohexanemethanol, 4-ethenyl-.alpha.,.alpha.,4-trimethyl-3-(1-methylethenyl)-, [1R-(1.alpha.,3.alpha.,4.beta.)]-                                     | 0.38 | -     | -    | -    | -    | -    |
| 11  | Cyclohexanol, 3-(aminomethyl)-3,5,5-trimethyl-                                                                                                         | -    | 0.47  | -    | -    | -    | -    |
| 12  | 3-Buten-2-ol, 2-methyl-                                                                                                                                | -    | -     | -    | 0.27 | -    | -    |
| 13  | Junenol                                                                                                                                                | -    | -     | 0.86 | -    | -    | -    |
| 14  | 3-Methylbenzyl alcohol                                                                                                                                 | -    | -     | -    | -    | 0.08 | -    |
| 15  | Cyclopropanemethanol, .alpha.-butyl-                                                                                                                   | -    | -     | -    | -    | -    | 0.04 |
| 16  | Toluene                                                                                                                                                | 0.08 | -     | -    | -    | -    | -    |
| 17  | p-Cymene                                                                                                                                               | 0.42 | -     | -    | -    | -    | -    |
| 18  | 4,7-Methanobenzofuran, 2,2'-oxybis[octahydro-7,8,8-trimethyl-, [2.alpha.-pha.(2'R*,3'aS*,4'R*,7'R*,7'aS*),3a.alpha.,4.alpha.,7.alpha.,7a.alpha.-pha.]- | 0.17 | -     | -    | -    | -    | -    |
| 19  | (1R,4aS,8aR)-1-Isopropyl-4,7-dimethyl-1,2,4a,5,6,8a-hexahydronaphthalene                                                                               | 0.14 | -     | -    | -    | -    | -    |
| 20  | Naphthalene, 1,2,3,5,6,8a-hexahydro-4,7-dimethyl-1-(1-methylethyl)-, (1S-cis)-                                                                         | 1.79 | 3.95  | 3.96 | -    | -    | 0.49 |
| 21  | Benzene, 1-ethyl-2,3-dimethyl-                                                                                                                         | -    | 0.5   | -    | -    | -    | -    |
| 22  | Naphthalene, 1,2,3,4,4a,5,6,8a-octahydro-4a,8-dimethyl-2-(1-methylethenyl)-, [2R-(2.alpha.-pha.,4a.alpha.,8a.beta.)]-                                  | -    | 13.23 | 3.9  | -    | 2.59 | -    |
| 23  | o-Cymene                                                                                                                                               | -    | -     | 0.21 | 0.27 | 0.51 | 0.37 |
| 24  | (4R,4aS,6S)-4,4a-Dimethyl-6-(prop-1-en-2-yl)-1,2,3,4,4a,5,6,7-octahydronaphthalene                                                                     | -    | -     | 1.46 | -    | -    | -    |
| 25  | 1H-Cyclopropa[a]naphthalene, 1a,2,3,3a,4,5,6,7b-octahydro-                                                                                             | -    | -     | -    | 1.22 | 2.42 | -    |

|    |                                                                                                                                                                        |       |      |      |       |       |       |
|----|------------------------------------------------------------------------------------------------------------------------------------------------------------------------|-------|------|------|-------|-------|-------|
| 26 | 1,1,3a,7-tetramethyl-, [1aR-(1a.alpha.,3a.alpha.,7b.alpha.)]-Naphthalene, 1,2,4a,5,8,8a-hexahydro-4,7-dimethyl-1-(1-methylethyl)-, [1S-(1.alpha.,4a.beta.,8a.alpha.)]- | -     | -    | -    | 1.53  | -     | -     |
| 27 | (4aS,8aS)-3,8a-Dimethyl-5-methylene-4,4a,5,6,8a,9-hexahydronaphtho[2,3-b]furan                                                                                         | -     | -    | -    | 1.18  | -     | -     |
| 28 | Benzofuran, 6-ethenyl-4,5,6,7-tetrahydro-3,6-dimethyl-5-isopropenyl-, trans-                                                                                           | 27.94 | -    | -    | -     | -     | -     |
| 29 | Benzene, 1-methoxy-2-methyl-                                                                                                                                           | 0.12  | -    | -    | -     | -     | -     |
| 30 | Propanal, 2-methyl-                                                                                                                                                    | -     | -    | -    | 0.38  | -     | 0.02  |
| 31 | Methacrolein                                                                                                                                                           | -     | -    | -    | 0.46  | -     | -     |
| 32 | Butanal, 3-methyl-                                                                                                                                                     | -     | -    | -    | 0.23  | -     | 0.02  |
| 33 | Acetaldehyde                                                                                                                                                           | -     | -    | -    | -     | -     | 2.34  |
| 34 | 2-Dodecen-4-yne, (E)-                                                                                                                                                  | -     | -    | -    | -     | -     | 0.03  |
| 35 | Epicurzerenone                                                                                                                                                         | -     | 3.24 | 1.41 | 0.74  | 0.39  | -     |
| 36 | Bicyclo[3.1.0]hex-2-ene, 2-methyl-5-(1-methylethyl)-                                                                                                                   | -     | -    | 1.42 | 0.27  | 15.52 | 24.41 |
| 37 | 2-Methyl-1,5-(4H)-dihydropyrido-(2,3-b)1,4-diazepine-4-one                                                                                                             | -     | 0.83 | -    | -     | -     | -     |
| 38 | trans-.alpha.-Bergamotene                                                                                                                                              | 5.47  | 2.32 | -    | -     | -     | -     |
| 39 | 3,7-Cyclodecadien-1-one, 10-(1-methylethenyl)-, (E,E)-                                                                                                                 | -     | -    | -    | -     | 0.1   | -     |
| 40 | Acetone                                                                                                                                                                | -     | -    | -    | 4.93  | -     | 0.78  |
| 41 | 2-Pentanone                                                                                                                                                            | -     | -    | -    | 0.17  | -     | 0.03  |
| 42 | 1,5,5-Trimethyl-6-methylene-cyclohexene                                                                                                                                | -     | -    | 1.41 | -     | -     | 0.76  |
| 43 | (5R,6R)-3,6-Dimethyl-5-(prop-1-en-2-yl)-6-vinyl-6,7-dihydrobenzofuran-4(5H)-one                                                                                        | -     | -    | -    | -     | -     | 0.14  |
| 44 | 2-(6-Fluoro-4-oxo-1,4-dihydroquinolin-1-yl)acetonitrile                                                                                                                | -     | 1.36 | -    | -     | -     | -     |
| 45 | Tricyclo[4.1.0.0(2,4)]heptane, 3,3,7,7-tetramethyl-5-(2-methyl-1-propenyl)-                                                                                            | -     | -    | -    | -     | 0.2   | -     |
| 46 | Longipinane, (E)-                                                                                                                                                      | -     | -    | -    | -     | 0.16  | -     |
| 47 | 3,5,8a-trimethyl-4,4a,8a,9-tetrahydronaphtho[2,3-b]furan                                                                                                               | -     | -    | -    | 5.27  | 0.3   | 0.07  |
| 48 | Ethylene oxide                                                                                                                                                         | -     | -    | -    | 15.38 | -     | -     |
| 49 | Tricyclo[2.2.1.0(2,6)]heptane, 1,7-dimethyl-7-(4-methyl-3-pentenyl)-, (-)-                                                                                             | -     | -    | -    | 0.42  | -     | -     |
| 50 | Cyclohexane, 1-ethenyl-1-methyl-2-(1-methylethenyl)-4-(1-methylethylidene)-                                                                                            | -     | -    | -    | 0.86  | -     | -     |
| 51 | 5,5-Dimethyl-1-vinylbicyclo[2.1.1]hexane                                                                                                                               | -     | -    | -    | -     | -     | 0.10  |

|    |                                    |       |      |       |       |      |      |
|----|------------------------------------|-------|------|-------|-------|------|------|
|    | (1R,2S,6S,7S,8S)-8-Isopropyl-1-    |       |      |       |       |      |      |
| 52 | methyl-3-methylenetricy-           | 1.54  | -    | -     | 9.28  | 7.27 |      |
|    | clo[4.4.0.02,7]decane-rel-         |       |      |       |       |      |      |
| 53 | Cyclohexene, 1-methyl-             | 0.09  | -    | -     | -     | -    |      |
| 54 | (1S)-2,6,6-Trimethylbicy-          | 1.56  | -    | -     | 12.52 | -    |      |
|    | clo[3.1.1]hept-2-ene               |       |      |       |       |      |      |
| 55 | .beta.-Pinene                      | 0.34  | -    | -     | 0.82  | 1.01 |      |
| 56 | .alpha.-Phellandrene               | 0.39  | -    | -     | 0.18  | 0.29 |      |
| 57 | D-Limonene                         | 0.28  | -    | 0.44  | 2.02  | 1.03 | 2.05 |
|    | Cyclohexene, 4-ethenyl-4-me-       |       |      |       |       |      |      |
| 58 | thyl-3-(1-methylethenyl)-1-(1-     | 1.38  | 9.81 | 10.01 | 2.94  | 3.88 | 2.02 |
|    | methylethyl)-, (3R-trans)-         |       |      |       |       |      |      |
| 59 | .alpha.-Cubebene                   | 2.43  | -    | 1.28  | -     | 0.33 | -    |
| 60 | Copaene                            | 0.13  | -    | -     | 0.13  | -    | -    |
| 61 | (-).beta.-Bourbonene               | 14.25 | 7.52 | 4     | 4.09  | 4.62 | 4.39 |
|    | Cyclohexane, 1-ethenyl-1-me-       |       |      |       |       |      |      |
| 62 | thyl-2,4-bis(1-methylethenyl)-,    | 9.3   | 8.11 | 8.67  | 5.18  | 3.57 | -    |
|    | [1S-(1.alpha.,2.beta.,4.beta.)]-   |       |      |       |       |      |      |
| 63 | .beta.-copaene                     | 1.85  | -    | 1.7   | 1.83  | -    | -    |
| 64 | trans-.alpha.-Bergamotene          | 7.67  | -    | -     | -     | -    | -    |
| 65 | (S,1Z,6Z)-8-Isopropyl-1-methyl-    | 1.74  | -    | -     | 1.09  | 0.71 | 0.81 |
|    | 5-methylenecyclodeca-1,6-diene     |       |      |       |       |      |      |
| 66 | 1,4,7,-Cycloundecatriene, 1,5,9,9- | 0.64  | 1.79 | 2.17  | -     | 0.91 | -    |
|    | tetramethyl-, Z,Z,Z-               |       |      |       |       |      |      |
|    | 1,2,4-Metheno-1H-indene, oc-       |       |      |       |       |      |      |
|    | tahydro-1,7a-dimethyl-5-(1-        |       |      |       |       |      |      |
| 67 | methylethyl)-,[1S-(1.alpha.,2.al-  | 0.29  | -    | -     | -     | 0.17 | -    |
|    | pha.,3a.beta.,4.alpha.,5.al-       |       |      |       |       |      |      |
|    | pha.,7a.beta.,8S*)]-               |       |      |       |       |      |      |
|    | Naphthalene, 1,2,4a,5,6,8a-hexa-   |       |      |       |       |      |      |
| 68 | hydro-4,7-dimethyl-1-(1-meth-      | 2.11  | 1.71 | 1.21  | -     | -    | -    |
|    | ylethyl)-                          |       |      |       |       |      |      |
| 69 | Germacrene D                       | 9.82  | 7.11 | -     | -     | -    | 0.19 |
|    | Naphthalene, decahydro-4a-me-      |       |      |       |       |      |      |
| 70 | thyl-1-methylene-7-(1-meth-        | 1.85  | -    | 6.09  | -     | -    | -    |
|    | ylethenyl)-, [4aR-(4a.alpha.,7.al- |       |      |       |       |      |      |
|    | pha.,8a.beta.)]                    |       |      |       |       |      |      |
| 71 | .beta.-Bisabolene                  | 1.31  | -    | -     | -     | -    | -    |
|    | 1-Isopropyl-4,7-dimethyl-          |       |      |       |       |      |      |
| 72 | 1,2,3,5,6,8a-hexahydronaphtha-     | 0.32  | -    | -     | -     | 1.23 | -    |
|    | lene                               |       |      |       |       |      |      |
|    | 1,4-Methano-1H-indene, octahy-     |       |      |       |       |      |      |
|    | dro-4-methyl-8-methylene-7-(1-     |       |      |       |       |      |      |
| 73 | methylethyl)-, [1S-(1.al-          | 0.49  | -    | -     | -     | -    | -    |
|    | pha.,3a.beta.,4.alpha.,7.al-       |       |      |       |       |      |      |
|    | pha.,7a.beta.)]-                   |       |      |       |       |      |      |
| 74 | Selina-3,7(11)-diene               | 0.38  | -    | -     | -     | -    | -    |
|    | 1,5-Cyclodecadiene, 1,5-dime-      |       |      |       |       |      |      |
| 75 | thyl-8-(1-methylethylidene)-,      | 1.2   | -    | 3.64  | -     | 1.26 | -    |
|    | (E,E)-                             |       |      |       |       |      |      |

|     |                                                                                                                        |   |      |       |      |      |       |
|-----|------------------------------------------------------------------------------------------------------------------------|---|------|-------|------|------|-------|
| 76  | (1R)-2,6,6-Trimethylbicyclo[3.1.1]hept-2-ene                                                                           | - | 5.82 | 1.89  | 0.13 |      | 23.75 |
| 77  | Bicyclo[3.1.1]heptane, 6,6-dimethyl-2-methylene-, (1S)-                                                                | - | 0.73 | -     | -    | -    | -     |
| 78  | .alfa.-Copaene                                                                                                         | - | 6.46 | 11.34 | 4.83 | 6.75 | 0.83  |
| 79  | .beta.-ylangene                                                                                                        | - | 3.02 | -     | 1.09 | 0.88 | 1.47  |
| 80  | Bicyclo[3.1.1]hept-3-ene-spiro-2,4'-(1',3'-dioxane), 7,7-dimethyl-                                                     | - | 2.42 | -     | -    | -    | -     |
| 81  | .gamma.-Muurolene                                                                                                      | - | 4.89 | 3.07  | -    | -    | -     |
| 82  | 7-epi-Silphiperfol-5-ene                                                                                               | - | 2.11 | -     | -    | -    | -     |
| 83  | Camphene                                                                                                               | - | -    | 0.62  | 0.17 | 0.29 |       |
| 84  | 3-Carene                                                                                                               | - | -    | 1.61  | 1.55 | 1.63 |       |
| 85  | .alfa.-Copaene                                                                                                         | - | -    | 11.42 | 3.83 | 8.75 | 0.83  |
| 86  | 1H-Cycloprop[e]azulene, 1a,2,3,4,4a,5,6,7b-octahydro-1,1,4,7-tetramethyl-, [1aR-(1a.alfa.,4.alfa.,4a.beta.,7b.alfa.)]- | - | -    | 5.43  | -    | 3.79 | 1.03  |
| 87  | Caryophyllene                                                                                                          | - | -    | 3.61  | 1.07 | 1.01 | -     |
| 88  | (1S,2E,6E,10R)-3,7,11,11-Tetramethylbicyclo[8.1.0]undeca-2,6-diene                                                     | - | -    | 0.53  | -    | -    | -     |
| 89  | isolekene                                                                                                              | - | -    | 1.29  | -    | -    | -     |
| 90  | (1R,9R,E)-4,11,11-Trimethyl-8-methylenebicyclo[7.2.0]undec-4-ene                                                       | - | -    | 1.48  | -    | 0.77 | -     |
| 91  | Naphthalene, 1,2,3,5,6,7,8,8a-octahydro-1,8a-dimethyl-7-(1-methylethenyl)-, [1R-(1.alfa.,7.beta.,8a.alfa.)]-           | - | -    | 0.63  | -    | -    | -     |
| 92  | 1H-Cycloprop[e]azulene, 1a,2,3,5,6,7,7a,7b-octahydro-1,1,4,7-tetramethyl-, [1aR-(1a.alfa.,7.alfa.,7a.beta.,7b.alfa.)]- | - | -    | 2.25  | -    | -    | -     |
| 93  | (-)-.alfa.-Panasinsen                                                                                                  | - | -    | 0.27  | -    | -    | 0.04  |
| 94  | Bicyclo[3.1.0]hexane, 4-methylene-1-(1-methylethyl)-                                                                   | - | -    | -     | -    | 5.31 | 8.44  |
| 95  | .beta.-Pinene                                                                                                          | - | -    | -     | -    | 0.82 | 1.01  |
| 96  | .beta.-Myrcene                                                                                                         | - | -    | -     | -    | 0.99 | 2.72  |
| 97  | 1,3-Cyclohexadiene, 1-methyl-4-(1-methylethyl)-                                                                        | - | -    | -     | -    | 0.09 | 5.19  |
| 98  | trans-.beta.-Ocimene                                                                                                   | - | -    | -     | -    | 0.27 | 0.49  |
| 99  | .beta.-Ocimene                                                                                                         | - | -    | -     | 0.30 | 0.55 | 1.39  |
| 100 | Cyclohexene, 4-methylene-1-(1-methylethyl)-                                                                            | - | -    | -     | -    | 0.15 | -     |
| 101 | Tricyclo[5.4.0.0(2,8)]undec-9-ene,2,6,6,9-tetramethyl-, (1R,2S,7R,8R)-                                                 | - | -    | -     | -    | 0.36 | -     |
| 102 | Bicyclogermacrene                                                                                                      | - | -    | -     | -    | 0.23 | -     |
| 103 | 1H-Cyclopropa[a]naphthalene, 1a,2,3,5,6,7,7a,7b-octahydro-1,1,7,7a-tetramethyl-, [1aR-                                 | - | -    | -     | 2.84 | 2.75 | 0.29  |



|     | (1a.alpha.,7.alpha.,7a.alpha.,7b.alpha.)]-                                                                                                                                            |      |      |      |       |      |      |
|-----|---------------------------------------------------------------------------------------------------------------------------------------------------------------------------------------|------|------|------|-------|------|------|
| 104 | 4,5-di-epi-aristolochene                                                                                                                                                              | -    | -    | -    |       | 0.23 |      |
| 105 | Cyclohexene, 6-ethenyl-6-methyl-1-(1-methylethyl)-3-(1-methylethylidene)-, (S)-                                                                                                       | -    | -    | -    | 0.82  | 0.83 |      |
| 106 | Bicyclo[4.4.0]dec-1-ene, 2-isopropyl-5-methyl-9-methylene-                                                                                                                            | -    | -    | -    | -     | 0.48 | 0.65 |
| 107 | Cyclohexene, 1-methyl-4-(1-methylethylidene)-                                                                                                                                         | -    | -    | -    | 0.36  | -    | 0.76 |
| 108 | Caryophyllene                                                                                                                                                                         | -    | -    | -    | 1.07  | -    | -    |
| 109 | Spiro[5.5]undeca-1,8-diene, 1,5,5,9-tetramethyl-, (R)-                                                                                                                                | -    | -    | -    | 0.27  | -    | -    |
| 110 | Humulene                                                                                                                                                                              | -    | -    | -    | 1.26  | -    | -    |
| 111 | 1H-Cyclopenta[1,3]cyclopropa[1,2]benzene, octahydro-7-methyl-3-methylene-4-(1-methylethyl)-, [3aS-(3a.alpha.,3b.beta.,4.beta.,7.alpha.,7aS*)]-                                        | -    | -    | -    | 18.76 | -    | -    |
| 112 | Aromandendrene                                                                                                                                                                        | -    | -    | -    | 3.69  | -    | -    |
| 113 | Azulene, 1,2,3,5,6,7,8,8a-octahydro-1,4-dimethyl-7-(1-methylethenyl)-, [1S-(1.alpha.,7.alpha.,8a.beta.)]-                                                                             | -    | -    | -    | 1.87  | -    | -    |
| 114 | 2,6,10,10-Tetramethylbicyclo[7.2.0]undeca-2,6-diene                                                                                                                                   | -    | -    | -    | 3.57  | -    | -    |
| 115 | (+)-3-Carene                                                                                                                                                                          | -    | -    | -    | -     | -    | 1.55 |
| 116 | (+)-4-Carene                                                                                                                                                                          | -    | -    | -    | -     | -    | 0.11 |
| 117 | .gamma.-Terpinene                                                                                                                                                                     | -    | -    | -    | -     | -    | 0.23 |
| 118 | Di-epi-.alpha.-cedrene                                                                                                                                                                | -    | -    | -    | -     | -    | 0.03 |
| 119 | .alpha.-Bourbonene                                                                                                                                                                    | -    | -    | -    | -     | -    | 0.68 |
| 120 | Cyclohexene, 1,5,5-trimethyl-3-methylene-                                                                                                                                             | -    | -    | -    | -     | -    | 0.19 |
| 121 | Naphthalene, 1,2,3,4,4a,5,6,8a-octahydro-7-methyl-4-methylene-1-(1-methylethyl)-, (1.alpha.,4a.beta.,8a.alpha.)-(1R,9R,E)-4,11,11-Trimethyl-8-methylenecyclobicyclo[7.2.0]undec-4-ene | 0.98 | -    | -    | -     | -    | -    |
| 122 | 3,6,8-Nonatrienoic acid, 5-methyl-, ethyl ester                                                                                                                                       | 0.71 | -    | -    | -     | -    | -    |
| 123 | Diethyl chloromalonate                                                                                                                                                                | -    | 2.13 | -    | -     | -    | -    |
| 124 | Propanedioic acid, (hydroxyimino)-, diethyl ester                                                                                                                                     | -    | 3.48 | -    | -     | -    | -    |
| 125 | Propanoic acid, 2,3-dibromo-, ethyl ester                                                                                                                                             | -    | 1.27 | -    | -     | -    | -    |
| 126 | Benzylcarbamate                                                                                                                                                                       | -    | -    | 0.28 | -     | -    | -    |
| 127 | Succinic acid, di(2,4-dichlorobenzyl) ester                                                                                                                                           | -    | -    | -    | -     | 0.23 | -    |
| 128 |                                                                                                                                                                                       |      |      |      |       |      |      |

---

|     |                                                              |   |   |   |      |   |      |
|-----|--------------------------------------------------------------|---|---|---|------|---|------|
| 129 | Acetic acid, methyl ester                                    | - | - | - | 1.47 | - | 0.15 |
| 130 | Androsta-1,4-dien-3-one, 17-hydroxy-17-methyl-, (17.alpha.)- | - | - | - | 0.15 | - | -    |

---

**Disclaimer/Publisher's Note:** The statements, opinions and data contained in all publications are solely those of the individual author(s) and contributor(s) and not of MDPI and/or the editor(s). MDPI and/or the editor(s) disclaim responsibility for any injury to people or property resulting from any ideas, methods, instructions or products referred to in the content.
